# Supplementary material for: Hydrogels with electrically conductive nanomaterials for biomedical applications
Source: Royal Society of Chemistry journal article supplement (doi:10.1039/d2tb02019j), 2023-01-01
Supplement: d2tb02019j1.pdf [file d2tb02019j1.pdf]

## Supplementary Information

**Table S1.** Electrical conductivity of hybrid hydrogels

| Material         | Polymer matrix                                                         | Application                              | Material Concentration | Hydrogel conductivity    | $\sigma_{\max}$ | Notes                                                     | Ref |
|------------------|------------------------------------------------------------------------|------------------------------------------|------------------------|--------------------------|-----------------|-----------------------------------------------------------|-----|
| Pd microwires    | GelMA gelatin methacrylate                                             | Muscle tissue engineering                | 1 mg/ml                | 9.50E-02                 | 2.5             | palladium-based metallic glass submicron wires            | 1   |
| Aniline dimer    | Gelatin                                                                | Neural tissue engineering. Drug delivery | 10 % w/w gelatin       | 1.00E-04                 | 1.00E-03        | Aniline carboxylated                                      | 2   |
| Aniline tetramer | HA-SH thiolated hyaluronic acid + PEGDA polyethylene glycol diacrylate | Muscle tissue engineering                | 7.5 % w/w              | 7.00E-06                 | 2.30E-02        |                                                           | 3   |
| Aniline pentamer | Agarose                                                                | Neural tissue engineering                | 5.1% w/w               | 1.00E-03 (at 0.96 % w/w) | 1.50E-02        | Agarose aminated                                          | 4   |
| PPy              | sodium alginate (SA) + carboxymethyl chitosan (CMCS)                   | Neural tissue engineering                | 40 % w/w               | 7.40E-06 (at 0.02 % w/w) | 8.00E-03        |                                                           | 5   |
| PPy              | HA hyaluronic acid                                                     |                                          | 3.35 mg/ml             | 1.20E-03                 | 7.30E-03        | 1% w/v Ppy polymerizes directly on the backbone of the HA | 6   |
| PPy              | Alginate                                                               | Tissue engineering                       | 0.67 mg/ml             | 8.20E-04                 | 1.00E-02        |                                                           | 7   |

## References

- 1 S. Ahadian, R. B. Sadeghian, S. Yaginuma, J. Ramón-Azcón, Y. Nashimoto, X. Liang, H. Bae, K. Nakajima, H. Shiku, T. Matsue, K. S. Nakayama and A. Khademhosseini, *Biomater. Sci.*, 2015, **3**, 1449–1458.
- 2 P. Zarrintaj, A. M. Urbanska, S. S. Gholizadeh, V. Goodarzi, M. R. Saeb and M. Mozafari, *J. Colloid Interface Sci.*, 2018, **516**, 57–66.
- 3 W. Wang, B. Tan, J. Chen, R. Bao, X. Zhang, S. Liang, Y. Shang, W. Liang, Y. Cui, G. Fan, H. Jia and W. Liu, *Biomaterials*, 2018, **160**, 69–81.
- 4 P. Zarrintaj, B. Bakhshandeh, I. Rezaeian, B. Heshmatian and M. R. Ganjali, *Sci. Rep.*, 2017, **7**, 17187.
- 5 Y. Bu, H.-X. Xu, X. Li, W.-J. Xu, Y. Yin, H. Dai, X. Wang, Z.-J. Huang and P.-H. Xu, *RSC Adv.*, 2018, **8**, 10806–10817.
- 6 J. Yang, G. Choe, S. Yang, H. Jo and J. Y. Lee, *Biomater. Res.*, 2016, **20**, 31.
- 7 S. Yang, LindyK. Jang, S. Kim, J. Yang, K. Yang, S.-W. Cho and J. Y. Lee, *Macromol. Biosci.*, 2016, **16**, 1653–1661.
